# Supplementary material
Source: PubMed Central journal article supplement (PMC3351913)
Supplement: cr2011109x1.pdf [file cr2011109x1.pdf]

gastric tumor sphere:

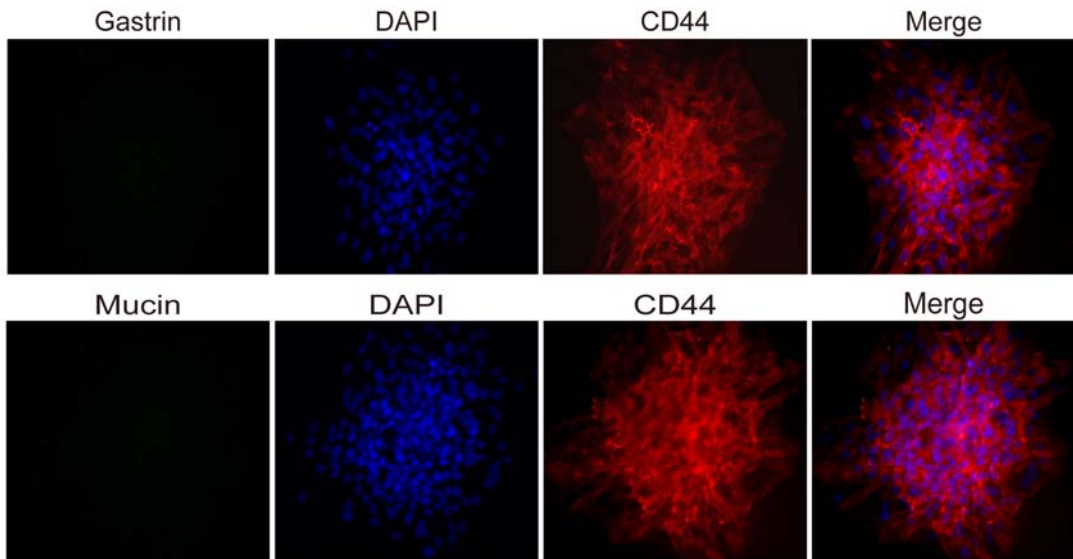

Fibroblast:

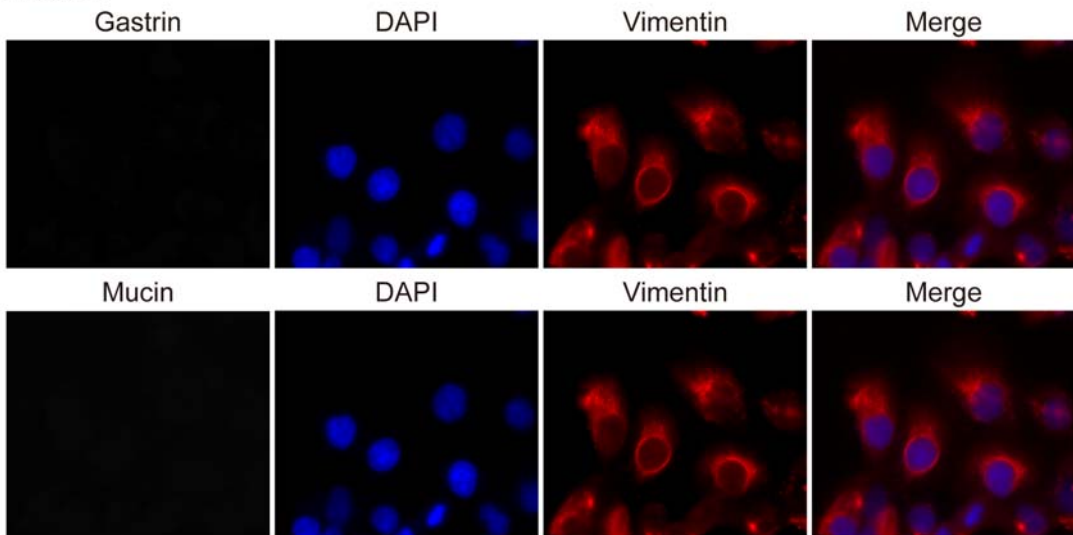

gastric tumor sphere:

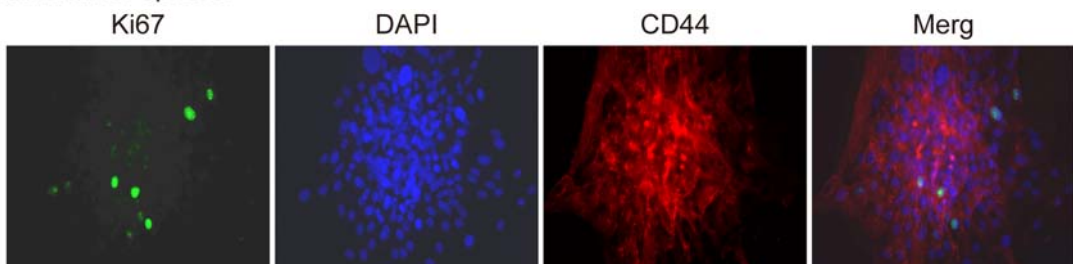

**Supplementary information, Figure S1** Spheres were cultured without serum and detected by specific antibodies against gastrin, mucin, CD44, or Ki67 antigens.

The fibroblast were detected by vimentin, gastrin, or mucin antibody.
