# Supplementary material
Source: PubMed Central journal article supplement (PMC3351913)
Supplement: cr2011109x2.pdf [file cr2011109x2.pdf]

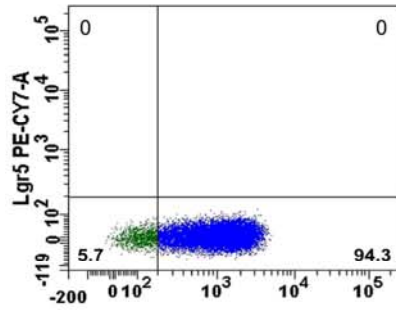

CD44 Expression →

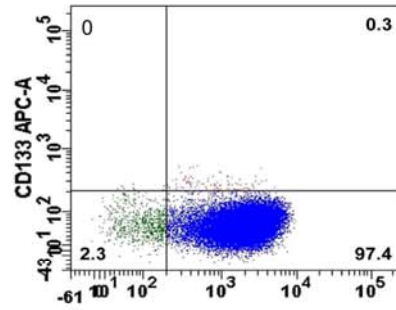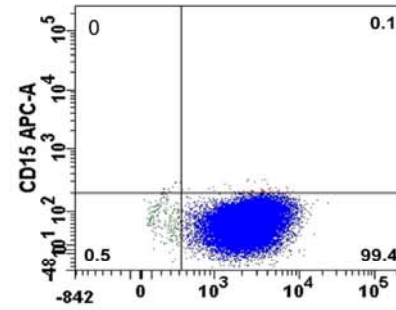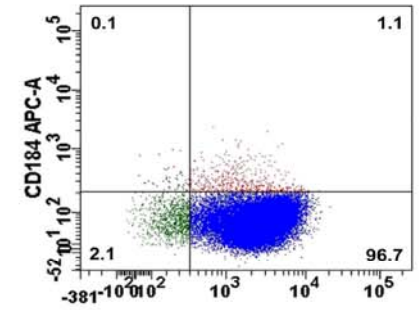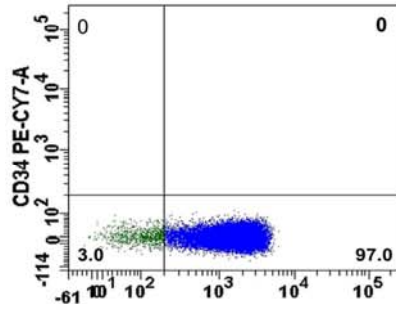

CD44 Expression →

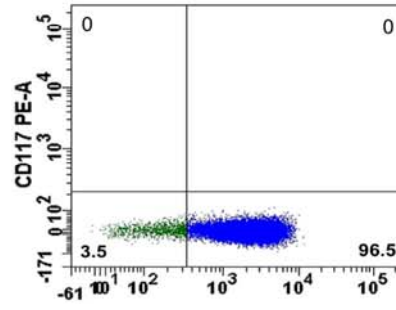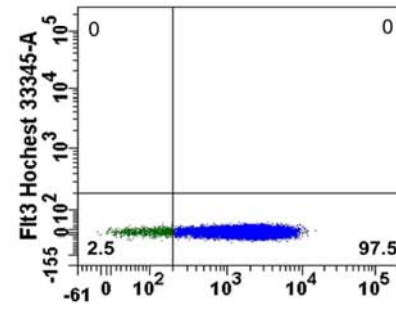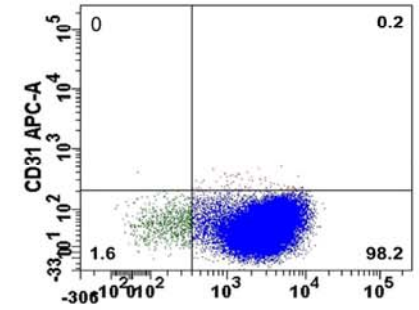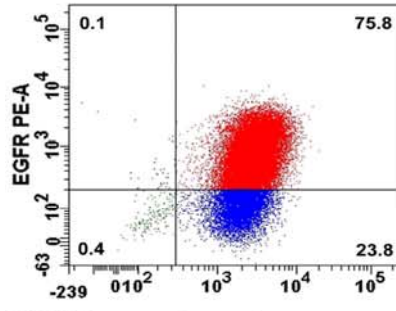

CD44 Expression →

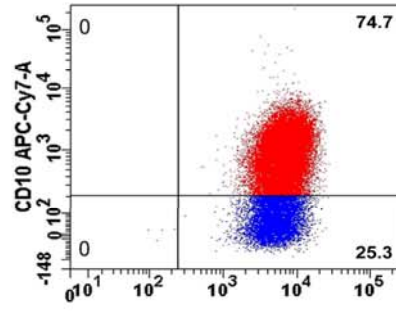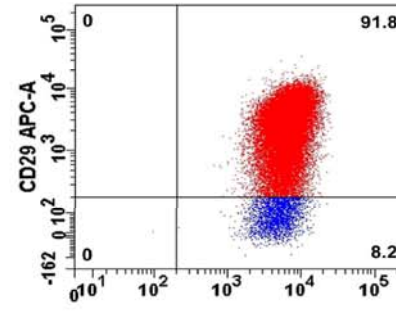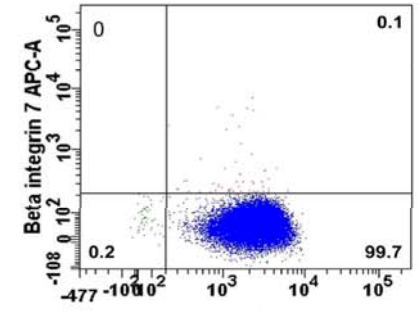

supplementary figure 2

Supplementary information, Figure S2 An example shows FACS analysis of immunophenotypes of the cells obtained from tumor tissues of human patients.
