# Supplementary material
Source: PubMed Central journal article supplement (PMC3351913)
Supplement: cr2011109x3.pdf [file cr2011109x3.pdf]

### Sphere

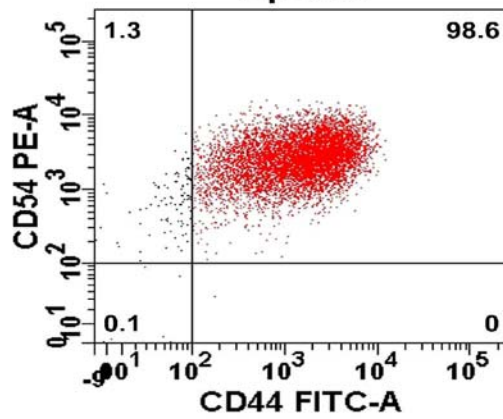

### Tissue

#### Patient

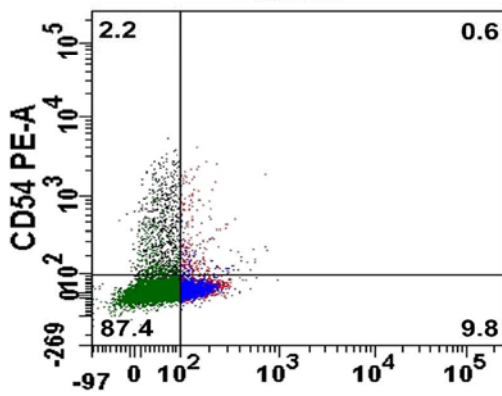

#### Normal

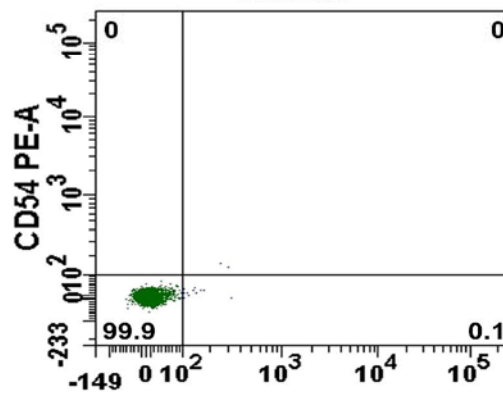

CD44 Expression →

### Blood

#### Patient

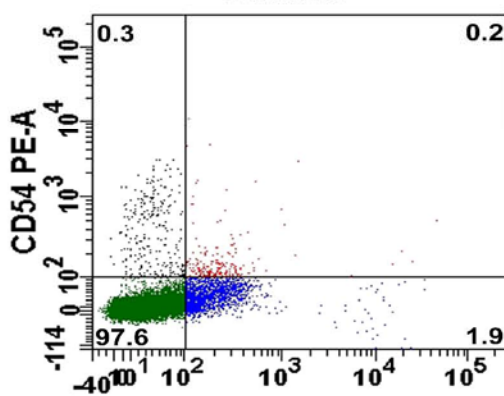

#### Normal

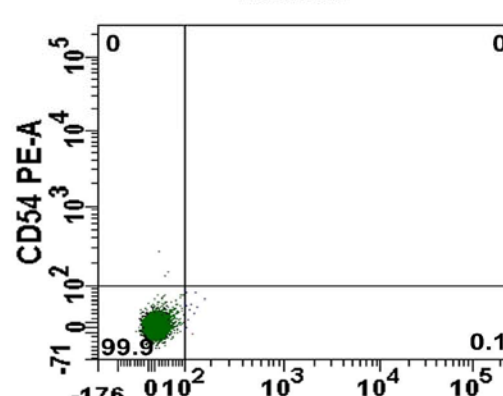

CD44 Expression →

Supplementary information, Figure S3 An example of FACS analysis of immunphenotypes of the cells obtained from tissue and blood samples of normal individuals and GAC patients.
