# Supplementary material
Source: PubMed Central journal article supplement (PMC3351913)
Supplement: cr2011109x4.pdf [file cr2011109x4.pdf]

Supplemental table 1. Tumorigenic capacity of different cell subpopulations

|                                     | Number of injected cells |                 |                 |                 |                 |
|-------------------------------------|--------------------------|-----------------|-----------------|-----------------|-----------------|
|                                     | $5 \times 10^2$          | $1 \times 10^3$ | $3 \times 10^3$ | $5 \times 10^3$ | $1 \times 10^4$ |
| CD44 <sup>+</sup> CD54 <sup>+</sup> | 1/5                      | 3/3             | 3/3             | 3/3             | 3/3             |
| CD44 <sup>+</sup> CD54 <sup>-</sup> | 0/5                      | 0/5             | 1/5             | 2/3             | 3/3             |
| CD44 <sup>-</sup> CD54 <sup>+</sup> | 0/5                      | 0/5             | 2/5             | 3/3             | 3/3             |
| CD44 <sup>-</sup> CD54 <sup>-</sup> | 0/5                      | 0/5             | 0/5             | 0/5             | 0/5             |
