# Supplementary material
Source: PubMed Central journal article supplement (PMC3351913)
Supplement: cr2011109x5.pdf [file cr2011109x5.pdf]

Supplemental table 2. viability of both unsorted cells and sorted CD44+/CD54+ cells before injecting into mice

| Sample No | Viable cells (%)       |            |
|-----------|------------------------|------------|
|           | Unsorted (total cell)* | CD44+CD54+ |
| 1         | 31.1                   | 0          |
| 2         | 93.1                   | 83.3       |
| 3         | 29.3                   | 0          |
| 4         | 92.7                   | 82.1       |
| 5         | 90.8                   | 80.7       |
| 6         | 35.7                   | 0          |
| 7         | 96.4                   | 83.5       |
| 8         | 94.3                   | 87.6       |
| 9         | 93.8                   | 81.9       |
| 10        | 37.8                   | 0          |
| 11        | 92.9                   | 83.1       |
| 12        | 95.2                   | 84.3       |
| 13        | 94.8                   | 88.3       |
| 14        | 21.1                   | 0          |
| 15        | 92.3                   | 84.1       |
| 16        | 28.9                   | 0.1        |
| 17        | 90.7                   | 85.2       |
| 18        | 93.8                   | 87.1       |
